# Supplementary material
Source: PubMed Central journal article supplement (PMC4268355)
Supplement: NIHMS640209-supplement-01.pdf [file NIHMS640209-supplement-01.pdf]

**Supplementary Table 1. Custom BAC probes used for FISH analysis**

| <b>BAC clones</b> | <b>Cytoband</b> | <b>Genes</b> | <b>GP-starting</b> | <b>GP-ending</b> |
|-------------------|-----------------|--------------|--------------------|------------------|
| RP11-77M13        | 22q12.1         | C-EWSR1      | 28987722           | 29143837         |
| RP11-965D15       | 22q12.1         | C-EWSR1      | 29191411           | 29383544         |
| RP11-945M21       | 22q12.1         | C-EWSR1      | 29419092           | 29630216         |
| RP11-155B12       | 22q12.2         | T-EWSR1      | 29899043           | 30057948         |
| RP11-551L12       | 22q12.2         | T-EWSR1      | 30038549           | 30179920         |
| RP11-794O14       | 22q12.2         | T-EWSR1      | 30190755           | 30400388         |
| RP11-72B10        | 9q33.3          | C-PBX3       | 128285736          | 128447161        |
| RP11-65N13        | 9q33.3          | C-PBX3       | 127934903          | 128104974        |
| RP11-106B17       | 9q33.3          | T-PBX3       | 128871113          | 129049761        |
| RP11-481D12       | 9q33.3          | T-PBX3       | 129049338          | 129224857        |
| RP11-1140F16      | 9q33.3          | T-PBX3       | 129381075          | 129547171        |

GP, genomic position; T, telomeric; C, centromeric; M, covering the gene; MC- covering the gene and extending centromerically outside the gene.
